# Supplementary material
Source: publisher site journal article supplement (https://www.dovepress.com/article/340570)
Supplement: Supplementary file 1 [file get_supplementary_file.php]

# Supplementary materials

**Table S1** Input parameters in the base-case analysis

**Table S2** Pooled prevalence and incidence of PCV among Asian patients with nAMD using random-effect model

**Table S3** Budget impact analysis results

**Figure S1** Cost-effectiveness plane of IVB combined with vPDT compared to IVB monotherapy

**Figure S2** Threshold analysis showing cost of verteporfin for using in combination with intravitreal bevacizumab.

**Figure S3** Average budget per year by drug cost and monitoring cost of IVB monotherapy and IVB combined with vPDT.

**References**

**Table S1** Input parameters in the base-case analysis

| **Parameters** | **Distribution** | **Mean** | **SE** | **Source** |
| --- | --- | --- | --- | --- |
| **Transitional probabilities** | | | | |
| First year: Probability of gaining 15 letters or more (per month) - IVR | beta | 0.0125 | 0.0012 | EVEREST II-year 1 1 |
| First year: Probability of gaining 15 letters or more (per month) - IVB | beta | 0.0125 | 0.0012 | Assumed equal to IVR |
| First year: Probability of gaining 15 letters or more (per month) - IVA | beta | 0.0329 | 0.0033 | PLANET-year 1 2 |
| First year: Probability of gaining 15 letters or more (per month) - IVR+vPDT | beta | 0.0231 | 0.0023 | EVEREST II-year 1 1 |
| First year: Probability of gaining 15 letters or more (per month) - IVB+vPDT | beta | 0.0231 | 0.0023 | Assumed equal to IVR+vPDT |
| First year: Probability of losing 15 letters or more (per month) - IVR | beta | 0.0044 | 0.0004 | EVEREST II-year 1 1 |
| First year: Probability of losing 15 letters or more (per month) - IVB | beta | 0.0044 | 0.0004 | Assumed equal to IVR |
| First year: Probability of losing 15 letters or more (per month) - IVA | beta | 0.0021 | 0.0002 | PLANET-year 1 2 |
| First year: Probability of losing 15 letters or more (per month) - IVR+vPDT | beta | 0.0011 | 0.0001 | EVEREST II-year 1 1 |
| First year: Probability of losing 15 letters or more (per month) - IVB+vPDT | beta | 0.0011 | 0.0001 | Assumed equal to IVR+vPDT |
| Probability of hemorrhage† (per month) - IVR | beta | 0.0013 | 0.00013 | Calculated from EVEREST II-year 2 3 (24 months) |
| Probability of hemorrhage† (per month) - IVB | beta | 0.0013 | 0.00013 | Assumed equal to IVR |
| Probability of hemorrhage† (per month) - IVA | beta | 0.0019 | 0.00019 | Calculated from PLANET (2 years) |
| Probability of hemorrhage† (per month) - IVR+vPDT | beta | 0.0002 | 0.00002 | Calculated from EVEREST II-year 2 3 (24 months) |
| Probability of hemorrhage† (per month) - IVB+vPDT | beta | 0.0002 | 0.00002 | Assumed equal to IVR+vPDT |
| Probability of recovery from hemorrhage (per month) | beta | 0.1100 | 0.0110 | 4 and assumed the same probability for all interventions. |
| Second year: Probability of gaining 15 letters or more (per month) - IVR | beta | 0.0228 | 0.0023 | EVEREST II-year 2 3 |
| Second year: Probability of gaining 15 letters or more (per month) - IVB | beta | 0.0228 | 0.0023 | Assumed equal to IVR |
| Second year: Probability of gaining 15 letters or more (per month) - IVA | beta | 0.0329 | 0.0033 | Calculated from PLANET-year 1 2 |
| Second year: Probability of gaining 15 letters or more (per month) - IVR+vPDT | beta | 0.0302 | 0.0030 | EVEREST II-year 2 3 |
| Second year: Probability of gaining 15 letters or more (per month) - IVB+vPDT | beta | 0.0302 | 0.0030 | Assumed equal to IVR+vPDT |
| Second year onwards: Probability of losing 15 letters or more (per month) - IVR | beta | 0.0047 | 0.0005 | EVEREST II-year 2 3 |
| Second year onwards: Probability of losing 15 letters or more (per month) - IVB | beta | 0.0047 | 0.0005 | Assumed equal to IVR |
| Second year onwards: Probability of losing 15 letters or more (per month) - IVA | beta | 0.0027 | 0.0003 | Calculated from PLANET-year 1 2 |
| Second year onwards: Probability of losing 15 letters or more (per month) - IVR+vPDT | beta | 0.0041 | 0.0004 | EVEREST II-year 2 3 |
| Second year onwards: Probability of losing 15 letters or more (per month) - IVB+vPDT | beta | 0.0041 | 0.0004 | Assumed equal to IVR+vPDT |
| Third year onwards: Probability of gaining 15 letters or more (per month) - IVR | beta | 0.0074 | 0.0007 | LUMINOUS, 2017 5 |
| Third year onwards: Probability of gaining 15 letters or more (per month) - IVB | beta | 0.0074 | 0.0007 | Assumed equal to IVR |
| Third year onwards: Probability of gaining 15 letters or more (per month) - IVA | beta | 0.0103 | 0.0010 | Assumed from proportion from LUMINIOUS 5 (IVR in nAMD) |
| Third year onwards: Probability of gaining 15 letters or more (per month) - IVR+vPDT | beta | 0.0095 | 0.0010 | Assumed from proportion from LUMINIOUS 5 (IVR in nAMD) |
| Third year onwards: Probability of gaining 15 letters or more (per month) - IVB+vPDT | beta | 0.0095 | 0.0010 | Assumed from proportion from LUMINIOUS 5 (IVR in nAMD) |
| ***Treatment-related ocular adverse events*** | | | | |
| Rate of vitreous hemorrhage (per month) | gamma | 0.000814 | 0.000814 | EVEREST II-year 2 3 (24 months) |
| Rate of subretinal hemorrhage (per month) | gamma | 0.000136 | 0.000136 | EVEREST II-year 2 3 (24 months)3 |
| Proportion of patients with vitreous hemorrhage who receive Par Plana Vitrectomy | gamma | 0.25 | 0.25 | Expert opinion |
| Rate of cataract (per month) | gamma | 0.000013 | 0.000013 | LUMINOUS, 2017 5 |
| Rate of endophthalmitis (per month) | gamma | 0.000025 | 0.000025 | LUMINOUS, 2017 5 |
| Rate of retinal detachment (per month) | gamma | 0.000013 | 0.000013 | LUMINOUS, 2017 5 |
| **Costs** | | | | |
| ***Direct medical cost*** | | | | |
| *Medications and administration* |  |  |  |  |
| Unit cost of bevacizumab per 1 injection (THB) | gamma | 769.11 | 107.45 | Primary data which a vial of bevacizumab 100 mg/4 ml could be divided into 30 pre-filled syringes. |
| Unit cost of ranibizumab 10 mg/ml (0.23 ml/vial) for 1 injection (THB) | gamma | 39,175.81 | 1,397.90 | Primary data |
| Unit cost of aflibercept 2 mg (0.05 ml/vial) for 1 injection (THB) | gamma | 38,803.55 | 1,382.98 | Primary data |
| Unit cost of verteporfin 15 mg/vial for PDT (THB) | gamma | 37,785.65 | 208.21 | Primary data |
| Unit cost of PDT, excluding verteporfin (THB per visit) | gamma | 2,060.03 | 206.00 | Primary data |
| Unit cost of an intravitreal administration and topical antibiotic | gamma | 1,718.82 | 171.88 | Primary data |
| First year: Frequency of IVR (per year) | gamma | 7.30 | 0.26 | EVEREST II-year 1 1 |
| First year: Frequency of IVB (per year) | gamma | 7.30 | 0.26 | Assumed equal to IVR |
| First year: Frequency of IVA (per year) | gamma | 8.10 | 0.10 | PLANET-year 1 2 |
| First year: Frequency of IVR in combination therapy (per year) | gamma | 5.20 | 0.19 | EVEREST II-year 1 1 |
| First year: Frequency of IVB in combination therapy (per year) | gamma | 5.20 | 0.19 | Assumed equal to IVR |
| First year: Frequency of vPDT in combination therapy (per year) | gamma | 1.50 | 0.06 | EVEREST II-year 1 1 |
| Second year: Frequency of IVR (per year) | gamma | 5.20 | 0.52 | EVEREST II-Year 2 3 |
| Second year: Frequency of IVB (per year) | gamma | 5.20 | 0.52 | Assumed equal to IVR |
| Second year: Frequency of IVA (per year) | gamma | 4.60 | 0.46 | PLANET-Year 2 6 |
| Second year: Frequency of IVR in combination (per year) | gamma | 2.90 | 0.29 | EVEREST II-Year 2 3 |
| Second year: Frequency of IVB in combination therapy (per year) | gamma | 2.90 | 0.29 | Assumed equal to IVR from EVEREST II-year 1 1 at month 12 |
| Second year: Frequency of vPDT in combination therapy (per year) | gamma | 0.70 | 0.07 | EVEREST II-Year 2 3 |
| Third year: Frequency of IVR (per year) | gamma | 3.10 | 0.31 | Estimated from frequencies in year 1 and 2 [Frequency = (-2.1 * year) + 9.4] |
| Third year: Frequency of IVB (per year) | gamma | 3.10 | 0.31 | Assumed equal to IVR |
| Third year: Frequency of IVA (per year) | gamma | 1.10 | 0.11 | Estimated from frequencies in year 1 and 2 [Frequency = (-3.5 * year) + 11.6] |
| Third year: Frequency of IVR in combination therapy (per year) | gamma | 1.55 | 0.16 | Assumed to be a half of the frequency of IVR in the third year |
| Third year: Frequency of IVB in combination therapy (per year) | gamma | 1.55 | 0.16 | Assumed equal to IVR |
| Third year: Frequency of vPDT in combination therapy (per year) | gamma | 0.44 | 0.04 | Assumed to be 1/7 of the frequency of IVR in the third year |
| *Cost of ocular examination* |  |  |  |  |
| Cost of indocyanine green angiography (THB) | gamma | 1,796.28 | 179.63 | Primary data |
| Unit cost of fundus fluorescein angiography, including contrast (THB) | gamma | 1,130.76 | 113.08 |
| Unit cost of OCT (THB) | gamma | 550.80 | 55.08 |
| First year: Frequency of OCT– IVB | gamma | 7.90 | 0.79 | Assumed that OCT was performed every visit |
| First year: Frequency of OCT– IVR | gamma | 7.90 | 0.79 |
| First year: Frequency of OCT – IVA | gamma | 8.00 | 0.80 |
| First year: Frequency of OCT – IVR+vPDT or IVB+vPDT | gamma | 7.90 | 0.79 |
| Second year: Frequency of OCT – IVB | gamma | 4.60 | 0.46 |
| Second year: Frequency of OCT – IVR | gamma | 4.60 | 0.46 |
| Second year: Frequency of OCT– IVA | gamma | 4.66 | 0.47 |
| Second year: Frequency of OCT – IVR+vPDT or IVB+vPDT | gamma | 4.60 | 0.46 |
| Third year: Frequency of OCT – IVB | gamma | 2.00 | 0.20 |
| Third year: Frequency of OCT – IVR | gamma | 2.00 | 0.20 |
| Third year: Frequency of OCT - IVA | gamma | 2.00 | 0.20 |
| Third year: Frequency of OCT – IVR+vPDT or IVB+vPDT | gamma | 2.00 | 0.20 |
| Unit cost of eye dilation (THB per visit) | gamma | 72.28 | 7.23 | 7 |
| Cost of Fundus camera examination for both eyes (THB) | gamma | 194.40 | 19.44 | Primary data |
| Cost of outpatient service, including cost of VA and IOP measurements (THB per day) | gamma | 305.32 | 30.53 | 7 |
| Cost of inpatient service (THB per day) | gamma | 1,310.84 | 131.08 | 7 |
| First year: Monitoring visit‡ (visits per year) - IVB | gamma | 7.90 | 0.79 | Assumed equal to IVR |
| First year: Monitoring visit‡ (visits per year) - IVR | gamma | 7.90 | 0.79 | EVEREST II-year 1 1 |
| First year: Monitoring visit‡ (visits per year) – IVA | gamma | 8.00 | 0.80 | PLANET-year 1 2 |
| First year: Monitoring visit‡ (visits per year) – IVR+vPDT or IVB+vPDT | gamma | 7.90 | 0.79 | EVEREST II-year 1 1 and assumed frequency of the visit of IVB group was equal to frequency of the visit of IVR group |
| Second year: Monitoring visit‡ (visits per year) - IVB | gamma | 4.60 | 0.46 | Assumed equal to IVR |
| Second year: Monitoring visit‡ (visits per year) - IVR | gamma | 4.60 | 0.46 | EVEREST II-year 1 1 |
| Second year: Monitoring visit‡ (visits per year) - IVA | gamma | 4.66 | 0.47 | PLANET-year 1 2 |
| Second year: Monitoring visit‡ (visits per year) – IVR+vPDT or IVB+vPDT | gamma | 4.60 | 0.46 | EVEREST II-year 2 3 and assumed frequency of the visit of IVB group was equal to frequency of the visit of IVR group |
| Third year onwards: Monitoring visit‡ (visits per year) - IVB | gamma | 2.00 | 2.00 | Expert opinion |
| Third year onwards: Monitoring visit‡ (visits per year) - IVR | gamma | 2.00 | 2.00 | Expert opinion |
| Third year onwards: Monitoring visit‡ (visits per year) - IVA | gamma | 2.00 | 2.00 | Expert opinion |
| Third year onwards: Monitoring visit‡ (visits per year) – IVR+vPDT or IVB+vPDT | gamma | 2.00 | 2.00 | Expert opinion |
| *Cost of treatment ‖* |  |  |  |  |
| Unit cost of Par Plana Vitrectomy in 2018 (THB) | gamma | 19,606.76 | 2,943.17 | Primary data |
| Treatment cost for cataract in 2010 (THB per episode) | gamma | 14,835.76 | 3,886.59 | Average cost of primary data from tertiary hospitals and a study of Yospaiboon Y, et al. 8 |
| Treatment cost for subretinal hemorrhage using Par Plana Vitrectomy and gas (THB per episode) | gamma | 41,615.28 | 4,161.53 | Primary data |
| Treatment cost for retinal detachment due to intravitreal injection (THB per episode) | gamma | 55,922.93 | 5,592.29 | Primary data¶ |
| ***Direct non-medical cost*** | | | | |
| Costs of device, equipment, and home renovation (once; THB) | gamma | 5,097.78 | 2,819.29 | Primary data |
| Costs of meal, transportation, and hotel and time cost of caregivers (THB per month) | gamma | 4,689.55 | 2,949.65 | Primary data |
| **Utilities** | | | | |
| BCVA of ≤25 ETDRS Letters | beta | 0.53 | 0.14 | Primary data |
| BCVA of 26-40 ETDRS Letters | beta | 0.68 | 0.11 | Primary data |
| BCVA of 41-55 ETDRS Letters | beta | 0.77 | 0.18 | Primary data |
| BCVA of 56-70 ETDRS Letters | beta | 0.83 | 0.05 | Primary data |
| BCVA of 71-85 ETDRS Letters | beta | 0.87 | 0.02 | Primary data |
| BCVA of 86-100 ETDRS Letters | beta | 0.87 | 0.02 | Assumed: equal to utility of VA 71-85 ETDRS letters |
| Complication: vitreous hemorrhage or subretinal hemorrhage (VA: CF, HM, PL, NPL) [during and post hemorrhage states) | beta | 0.53 | 0.14 | Assumed: equal to utility of ≤25 ETDRS Letters ETDRS letters |
| **Parameter for budget impact analysis** |  |  |  |  |
| Proportion of patients with unilateral PCV |  | 75% | % | Expert opinion |
| Pooled prevalence of patients with PCV among Asian patients with nAMD (patients) |  | 24% | % | Meta-analysis (Table S3) |
| Average number of patients with nAMD per year |  | 5,280 | patients | Primary data§ |
| Pooled incidence of PCV among Asian patients with nAMD (eye) |  | 18% | % | Meta-analysis (Table S3) |
| **Notes**: Italicized-bold text represents the parameter categories and italicized text represents subgroups of the parameter categories. † Hemorrhage includes vitreous hemorrhage and subretinal hemorrhage. ‡ Monitoring visit includes visual acuity measurement and outpatient service. **‖** Treatment cost for vitreous hemorrhage using Par Plana Vitrectomy (THB per episode) was 39,615.28 THB (assumed using 3 days of hospitalization, PPV, dilation, Fundus photography, OCT, medications, IVB, and 4 outpatient follow-up visits and VA measurements). Total cost of cataract treatment per 1 episode was 19,426.64 THB which includes cost of cataract treatment, cost of 2.35 days of hospitalization, and costs of 4 outpatient follow-up visits and VA measurements. Total treatment cost for endophthalmitis per 1 episode was 55,873.99 THB (assumed 10 days of hospitalization, cost of endophthalmitis treatment, and 6 outpatient follow-up visits and VA measurements). ¶ The cost of retinal detachment treatment calculated from 3 days of hospitalization, 4 outpatient visits for follow up, treatment cost, and costs of gas, silicone oil, heavy silicone oil, and medication from tertiary hospitals. § Beneficiaries of Universal Health Coverage Scheme and Civil Servant Medical Benefit Scheme who received intravitreal bevacizumab for treating nAMD derived from databases of the National Health Security Office (2012-2019) and the Comptroller General's Department (2019). | | | | |
| **Abbreviations:** BCVA, best corrected visual acuity; CF, count finger; ETDRS, the Early Treatment Diabetic Retinopathy Study; HM, hand motion; ICG, Indocyanine green; IOP, intraocular pressure; IVA, intravitreal aflibercept; IVB, intravitreal bevacizumab; IVR, intravitreal ranibizumab; mg, milligram; ml, milliliter; nAMD, neovascular age-related macular degeneration; NPL, no light perception; OCT, optical coherence tomography; OPD, outpatient department; PCV, polypoidal choroidal vasculopathy; PL, light perception; RR, relative risk; SE, standard error; THB, Thai baht; VA, visual acuity; vPDT, verteporfin photodynamic therapy. | | | | |

**Table S2** Pooled prevalence and incidence of PCV among Asian patients with nAMD using random-effect model

| **Study** | **Prevalence**  (patients) | | **[95% CI]** | | **Study** | **Incidence**  (eyes) | | **[95% CI]** | |
| --- | --- | --- | --- | --- | --- | --- | --- | --- | --- |
| Chen SJ (2004); Taiwan† | 0.16 | 0.13 | | 0.20 | Sho (2003); Japan9 | 0.23 | 0.2 | | 0.27 |
| MarukoI I (2007); Japan10 | 0.55 | 0.49 | | 0.49 | Kwok (2002); China11 | 0.11 | 0.07 | | 0.16 |
| Liu Y (2007); China12 | 0.25 | 0.18 | | 0.32 |  |  |  | |  |
| Chen SJ (2008); Taiwan13 | 0.11 | 0.01 | | 0.33 |  |  |  | |  |
| Cheung GCM (2017); Singapore14 | 0.14 | 0.11 | | 0.18 |  |  |  | |  |
| **Pooled prevalence** | **0.24** | **0.1** | | **0.39** | **Pooled incidence** | **0.18** | **0.15** | | **0.21** |
| Heterogeneity chi2 = 159.51 (d.f. = 4) p < 0.01  I2 (variation in ES attributable to heterogeneity) = 97.49% | | | | | Test of ES=0: z= 12.23 p < 0.01  I2 =0.00% | | | | |

**Note:** †Unpublished data mentioned in a study of Chen SJ, et al.13.

**Abbreviations**: CI, confidence interval; d.f., degree of freedom; ES, effect estimate; nAMD, neovascular age-related macular degeneration; PCV, polypoidal choroidal vasculopathy.

**Table S3** Budget impact analysis results

| **Fiscal year** | **IVB** | **IVB+vPDT** | **IVR** | **IVA** | **IVR+vPDT** | **Incremental budget* (million USD)** | | | |
| --- | --- | --- | --- | --- | --- | --- | --- | --- | --- |
|  | **(million USD)** | **(million USD)** | **(million USD)** | **(million USD)** | **(million USD)** | **IVB + vPDT** | **IVR** | **IVA** | **IVR + vPDT** |
| **The original cost of verteporfin (37,786 THB per vial)** | | | | | | | | | |
| 1 | 3 | 8 | 28 | 31 | 26 | 5 | 26 | 28 | 23 |
| 2 | 3 | 7 | 33 | 32 | 26 | 4 | 30 | 29 | 23 |
| 3 | 3 | 7 | 34 | 27 | 26 | 5 | 31 | 24 | 24 |
| 4 | 3 | 8 | 40 | 29 | 30 | 5 | 36 | 26 | 27 |
| 5 | 4 | 9 | 45 | 31 | 33 | 6 | 42 | 27 | 30 |
| Total 5 years | 15 | 40 | 180 | 149 | 142 | 25 | 165 | 134 | 126 |
| Average/ year | 3 | 8 | 36 | 30 | 28 | 5 | 33 | 27 | 25 |
| **The cost of verteporfin at the Thai willingness to pay threshold (20,889 THB per vial)** | | | | | | | | | |
| 1 | 3 | 5 | 28 | 31 | 24 | 3 | 26 | 28 | 21 |
| 2 | 3 | 5 | 33 | 32 | 24 | 2 | 30 | 29 | 21 |
| 3 | 3 | 5 | 34 | 27 | 24 | 2 | 31 | 24 | 21 |
| 4 | 3 | 6 | 40 | 29 | 27 | 3 | 36 | 26 | 24 |
| 5 | 4 | 7 | 45 | 31 | 30 | 3 | 42 | 27 | 27 |
| Total 5 years | 15 | 28 | 180 | 149 | 129 | 13 | 165 | 134 | 114 |
| Average/  year | 3 | 6 | 36 | 30 | 26 | 3 | 33 | 27 | 23 |

**Note:** IVB monotherapy was reference.

**Abbreviations:** IVA, intravitreal aflibercept; IVB, intravitreal bevacizumab; IVB+vPDT, intravitreal bevacizumab in combination with verteporfin photodynamic therapy; IVR, intravitreal ranibizumab; IVR+vPDT, intravitreal ranibizumab in combination with verteporfin photodynamic therapy; USD, the United States dollar.


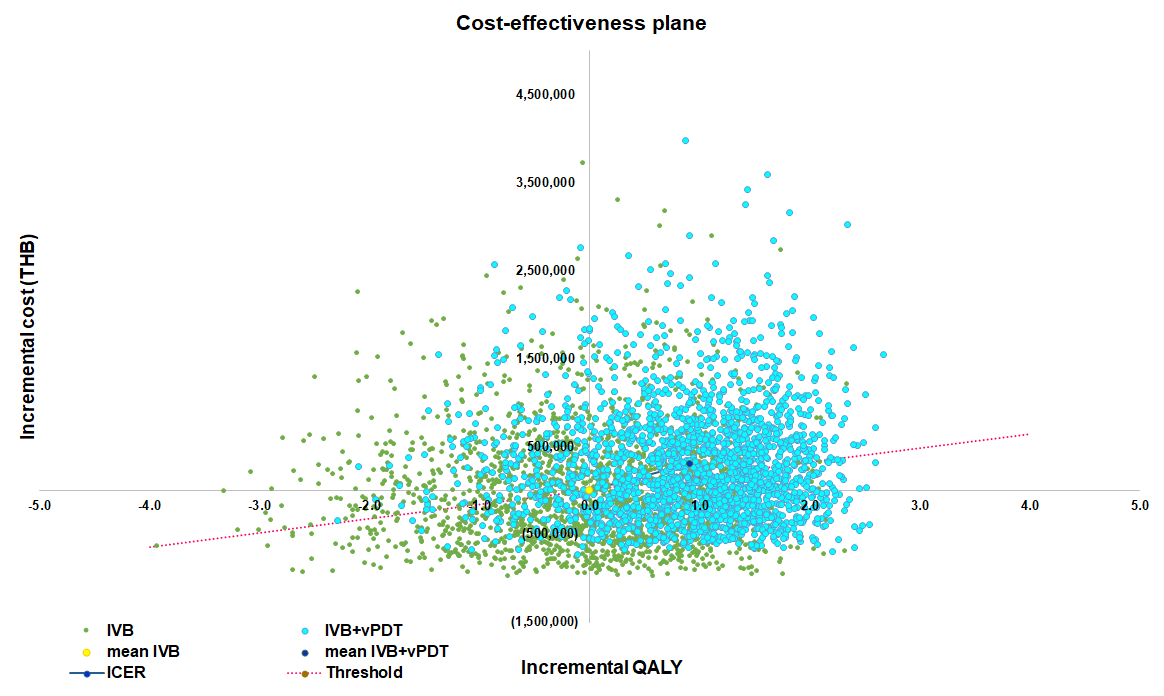


**Figure S1** Cost-effectiveness plane of IVB combined with vPDT compared to IVB monotherapy

**Abbreviations**: IVB, intravitreal bevacizumab; IVB+vPDT, intravitreal bevacizumab in combination with verteporfin photodynamic therapy; ICER, incremental cost-effectiveness ratio; QALY, quality-adjusted life-year; THB, Thai baht.


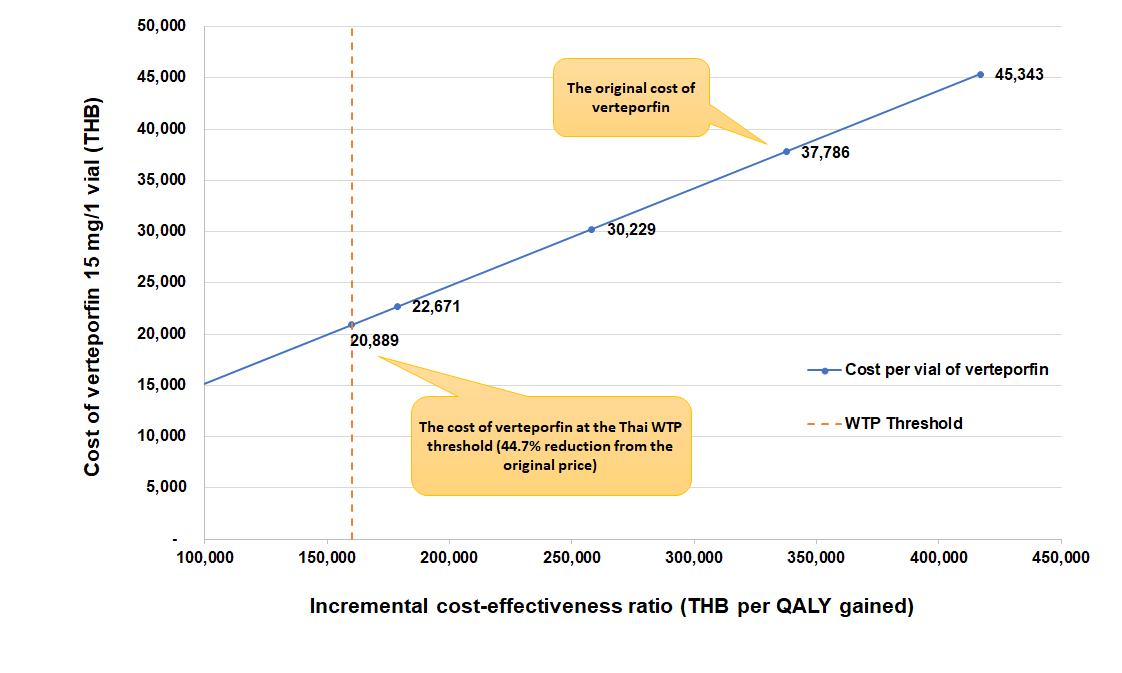


**Figure S2** Threshold analysis showing cost of verteporfin for using in combination with intravitreal bevacizumab.

**Abbreviations**: QALY, quality-adjusted life-year; THB, Thai baht; WTP, willingness to pay.


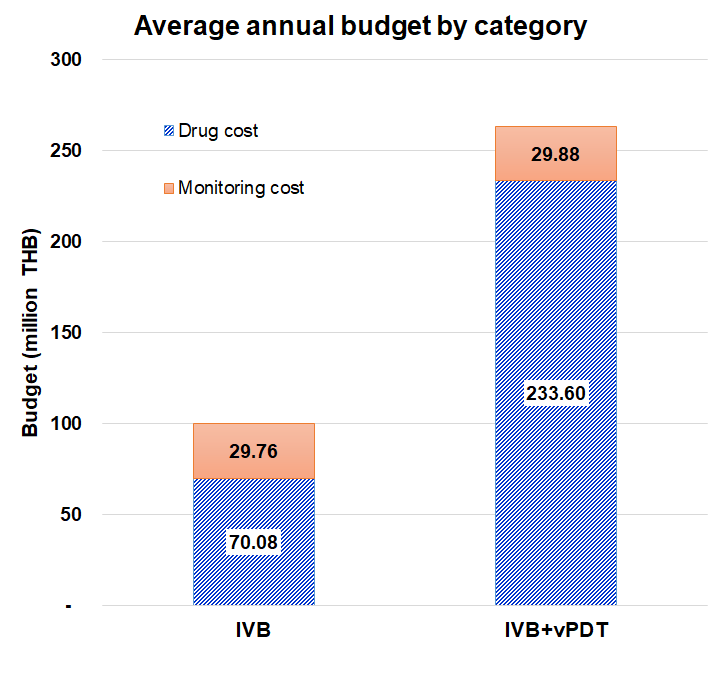


**Figure S3** Average budget per year by drug cost and monitoring cost of IVB monotherapy and IVB combined with vPDT.

**Abbreviations**: IVB, intravitreal bevacizumab; IVB+vPDT, intravitreal bevacizumab in combination with verteporfin photodynamic therapy; THB, Thai baht.

**References** (Supplementary material)

1. Koh A, Lai TY, Takahashi K, et al. Efficacy and safety of ranibizumab with or without verteporfin photodynamic therapy for polypoidal choroidal vasculopathy: A randomized clinical trial. *JAMA ophthalmology.* 2017;135(11):1206-1213.

2. Lee WK, Iida T, Ogura Y, et al. Efficacy and safety of intravitreal aflibercept for polypoidal choroidal vasculopathy in the PLANET study: A randomized clinical trial. *JAMA ophthalmology.* 2018;136(7):786-793.

3. Lim TH, Lai TYY, Takahashi K, et al. Comparison of ranibizumab with or without verteporfin photodynamic therapy for polypoidal choroidal vasculopathy: the EVEREST II randomized clinical trial. *JAMA ophthalmology.* 2020;138(9):935-942.

4. Salmon HA, Chalk D, Stein K. How lack of information hampers decision making in ophthalmology. *British Journal of Healthcare Management.* 2017;23(1):28-38.

5. *LUMINOUS™: Study to observe the effectiveness and safety of ranibizumab through individualized patient treatment and associated outcomes.* Basel: Novartis Pharma AG; 12 April 2017 2017.

6. Wong TY, Ogura Y, Lee WK, et al. Efficacy and safety of intravitreal aflibercept for polypoidal choroidal vasculopathy: two-year results of the aflibercept in polypoidal choroidal vasculopathy study. *American Journal of Ophthalmology.* 2019;204:80-89.

7. Riewpaiboon A. Standard cost lists for health technology assessment. Bangkok: Tana Press Co., Ltd.; 2011.

8. Yospaiboon Y, Yospaiboon K, Ratanapakorn T, Sinawat S, Sanguansak T, Bhoomibunchoo C. Management of cataract in the Thai population. *Journal of the Medical Association of Thailand = Chotmaihet thangphaet.* 2012;95 Suppl 7:S177-181.

9. Sho K, Takahashi K, Yamada H, et al. Polypoidal choroidal vasculopathy: incidence, demographic features, and clinical characteristics. *Archives of ophthalmology (Chicago, Ill : 1960).* 2003;121(10):1392-1396.

10. Maruko I, Iida T, Saito M, Nagayama D, Saito K. Clinical Characteristics of Exudative Age-related Macular Degeneration in Japanese Patients. *American Journal of Ophthalmology.* 2007;144(1):15-22.e12.

11. Kwok AKH, Lai TYY, Chan CWN, Neoh EL, Lam DSC. Polypoidal choroidal vasculopathy in Chinese patients. *The British journal of ophthalmology.* 2002;86(8):892-897.

12. Liu Y, Wen F, Huang S, et al. Subtype lesions of neovascular age-related macular degeneration in Chinese patients. *Graefe's Archive for Clinical and Experimental Ophthalmology.* 2007;245(10):1441-1445.

13. Chen S-J, Cheng C-Y, Peng K-L, et al. Prevalence and Associated Risk Factors of Age-Related Macular Degeneration in an Elderly Chinese Population in Taiwan: The Shihpai Eye Study. *Investigative Ophthalmology & Visual Science.* 2008;49(7):3126-3133.

14. Cheung CMG, Laude A, Yeo I, et al. Systemic, Ocular and Genetic Risk Factors for Age-related Macular Degeneration and Polypoidal Choroidal Vasculopathy in Singaporeans. *Scientific Reports.* 2017;7(1):41386.
